# Supplementary material for: Genomic landscape and clonal architecture of mouse oral squamous cell carcinomas dictate tumour ecology
Source: PubMed Central journal article supplement (PMC7652942; doi:10.1038/s41467-020-19401-9), 2020-11-09
Supplement: 41467_2020_19401_MOESM1_ESM.pdf [file 41467_2020_19401_MOESM1_ESM.pdf]

Supplementary Information

**GENOMIC LANDSCAPE AND CLONAL ARCHITECTURE OF MOUSE  
ORAL SQUAMOUS CELL CARCINOMAS DICTATE TUMOUR ECOLOGY**

*Sequeira et al.*

Supplementary Figures 1- 5

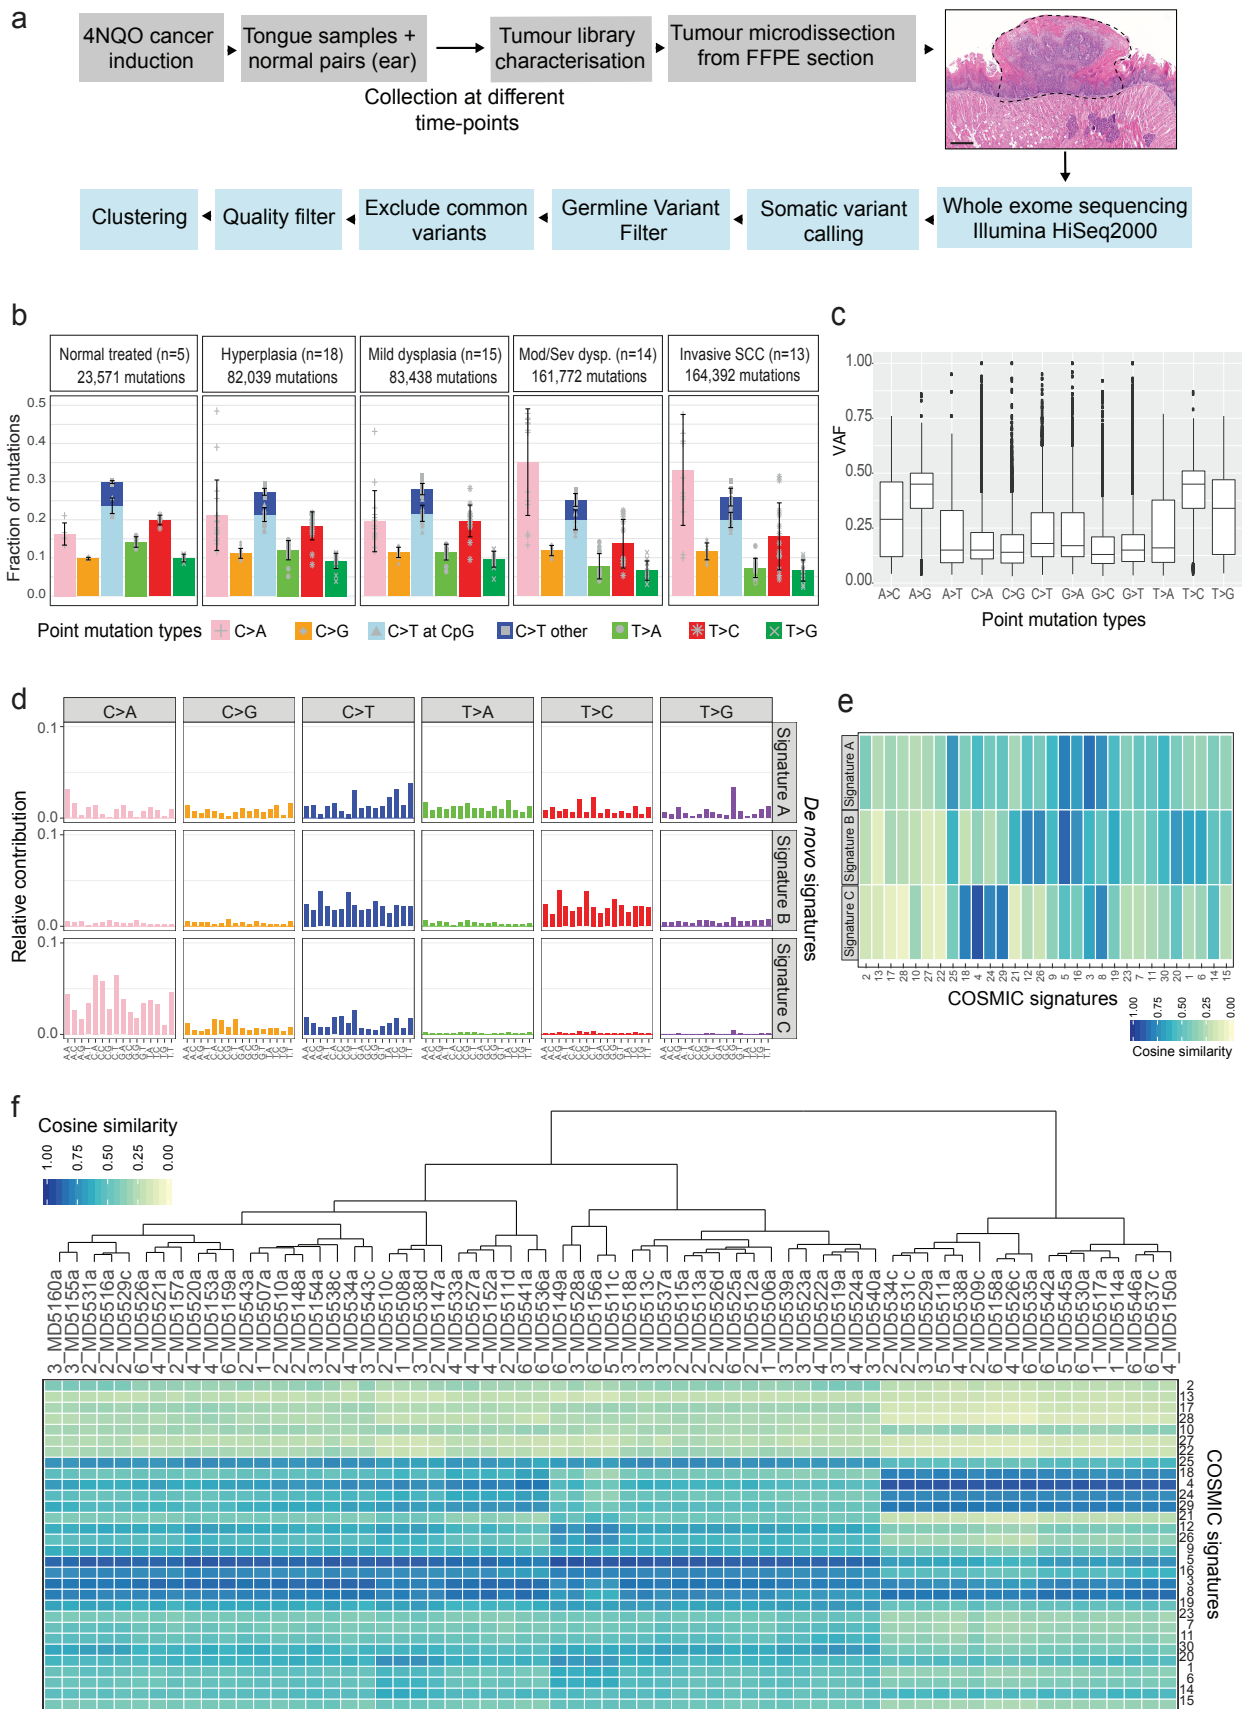

**Supplementary Figure 1. Detailed experimental design and tumour grading and Mutational signature analysis. Related to Figure 1. (a) Experimental design and analytical workflow for calling somatic variants. Sample preparation (grey): the tumours identified were preserved in FFPE blocks. All**

animals had a normal matched control tissue harvested from the ear. Tumour histology features were observed microscopically and characterised. Tumour region was micro-dissected avoiding healthy tissue contamination. Both FFPE blocks and matched control tissue were sent for WES. Genomic Analysis (light blue): sequencing data was filtered for inter-individual variability with somatic calling. Filtering, clustering and data validation was completed. **(b)** Mutational signatures for each tumour grading, from normal tissue treated, hyperplasia, mild dysplasia, moderate/severe dysplasia and invasive SCCs. Error bars indicate standard deviation over all samples. **(c)** Frequencies for each of the nucleotide substitutions are displayed as boxplots (the middle line is the median, the lower and upper hinges are the first and third quartiles, the upper whisker extends from the hinge to the largest value no further than  $1.5 \times$  inter-quartile range from the hinge and the lower whisker extends from the hinge to the smallest value at most  $1.5 \times$  inter-quartile range of the hinge. Data beyond the end of the whiskers are outliers that are plotted individually). **(d)** 96-profile of the three *de novo* signatures. **(e)** Similarity heatmap featuring the contribution of each *De novo* signature to the known COSMIC signatures<sup>32</sup>. **(f)** Similarity heatmap featuring the contribution of known COSMIC signatures for all the samples.

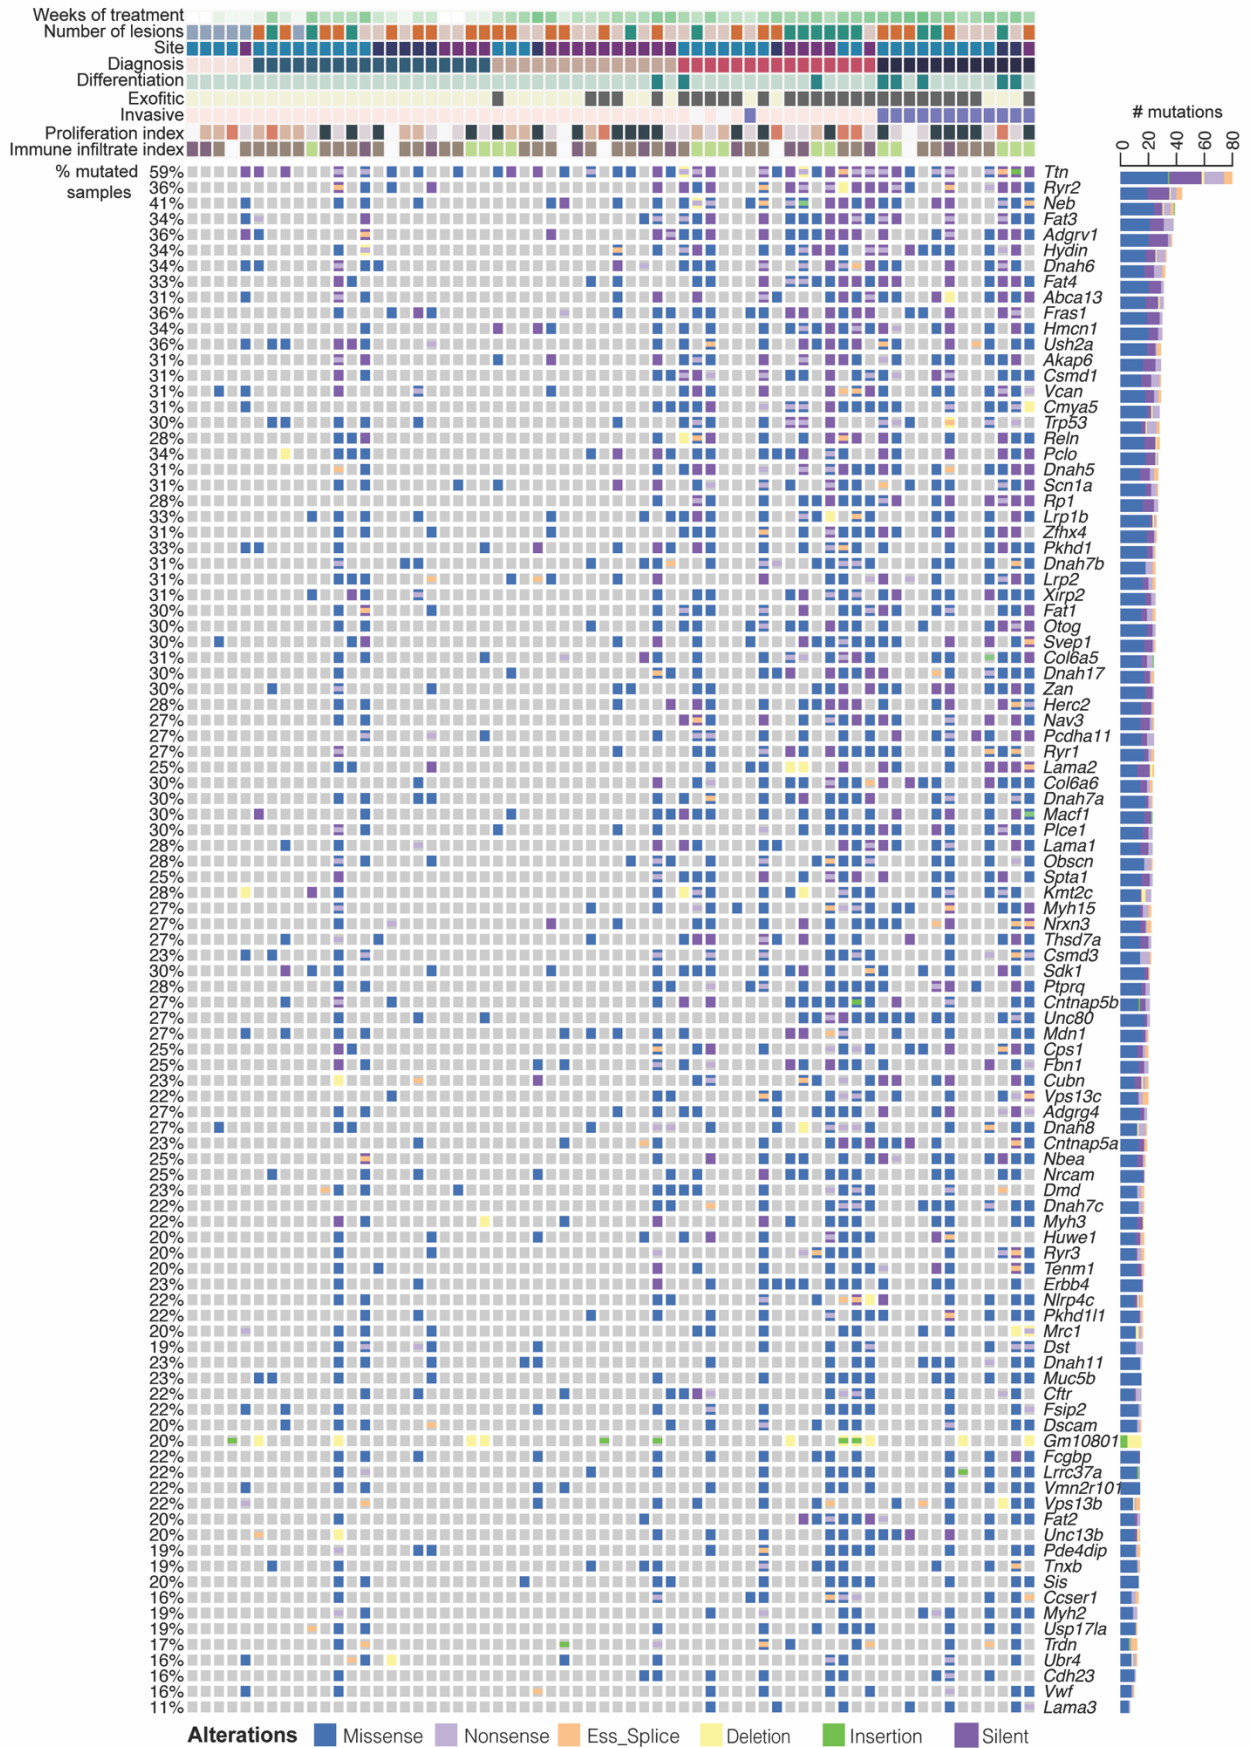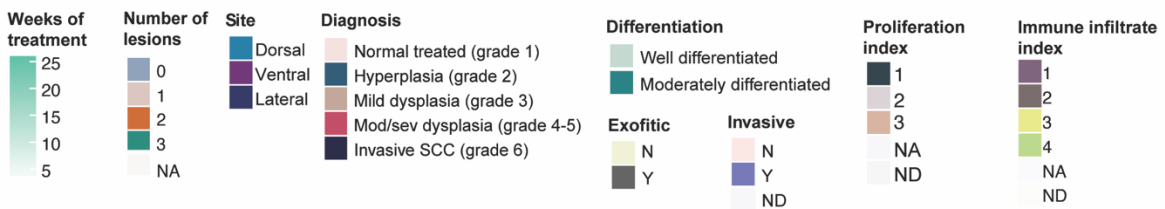

**Supplementary Figure 2. Data matrix showing mutational landscape of 4NQO-induced TSCCs including recurrent somatic mutations compared with tumour ecology. Related to Figure 2.** The top panel shows the key clinical parameters: weeks of 4NQO treatment, number of lesions per tongue, tumour-site (dorsal, ventral, lateral), diagnosis (tumour-grade), differentiation status, exophytic tumour (yes/no), invasive tumour (yes/no), proliferation index, immune-infiltrate index and type of SNV – ‘alterations’ (Supplementary Data 1, 2 and 3). The bottom panel shows the plot of significantly mutated genes from our samples. Representation of the mutations (n=1177) in the top 100 most mutated genes coloured by the types of mutation. Each column denotes an individual sample (n=65), and each row represents a gene. Genes are ordered by level of significance. The right panel shows the number of mutations in each gene. Percentages represent the fraction of tumours harbouring mutations in the corresponding gene.

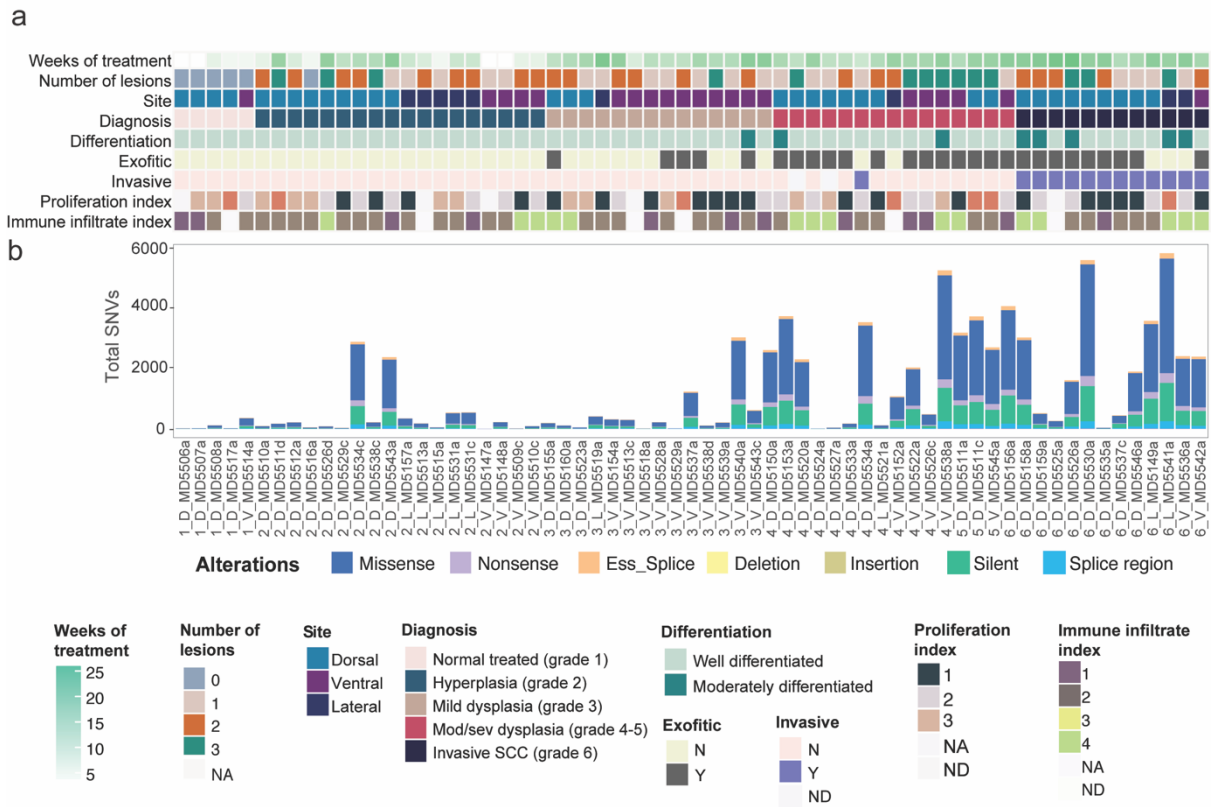

**Supplementary Figure 3. Correlation between mutation burden and TSCCs tumour ecology. (a)** Key clinical parameters (as in Figure 2): colour coding indicates number of weeks of treatment, number of lesions per tongue, site of the sequenced lesion (dorsal, ventral or lateral), diagnosis or tumour-grade, differentiation status, exophytic tumour (yes/no), invasive tumour (yes/no), proliferation index, immune-infiltrate index (CD45) and type of SNV (Supplementary Tables 1, 2 and 3). **(b)** Barplot showing the number of mutations per sample. All missense and nonsense SNVs, splicing mutations (Exonic Splicing Silencer ‘Ess\_Splice’ and splice regions), insertions, deletions and silent mutations in genes listed in Supplementary Data 3 and Figure 2 are displayed.

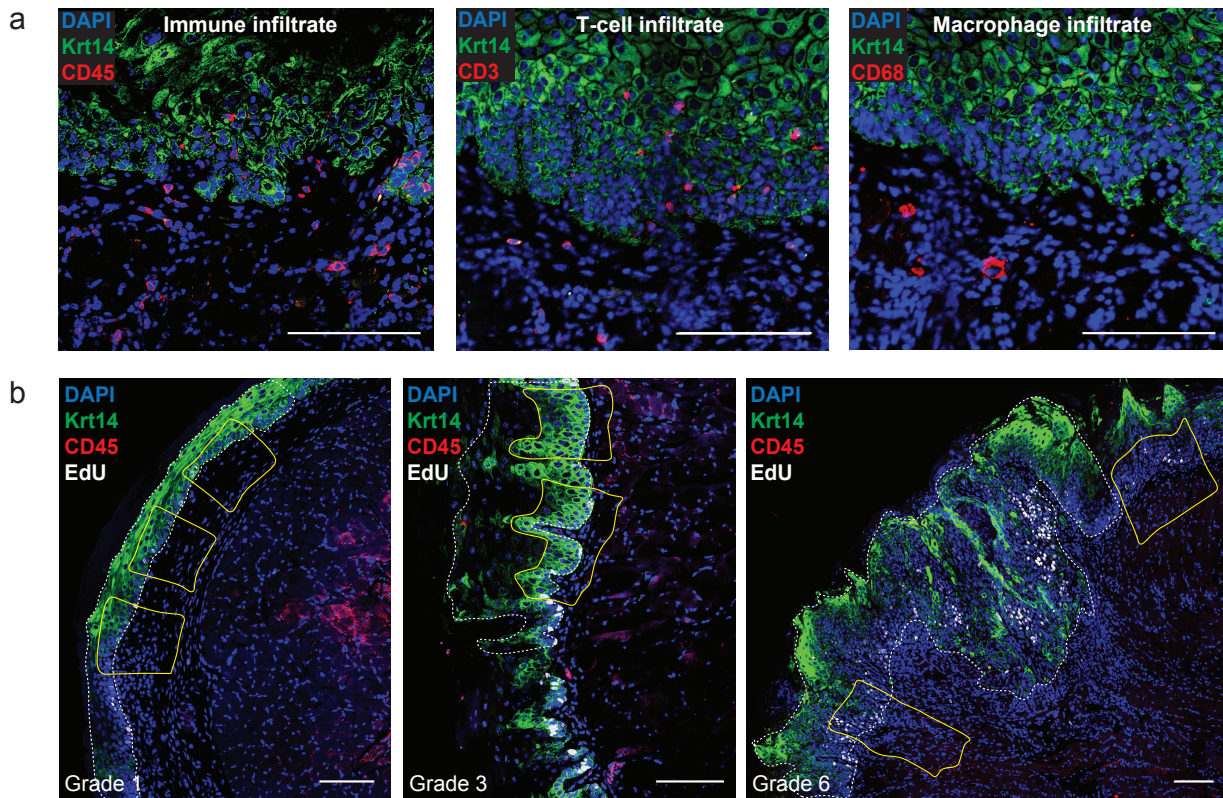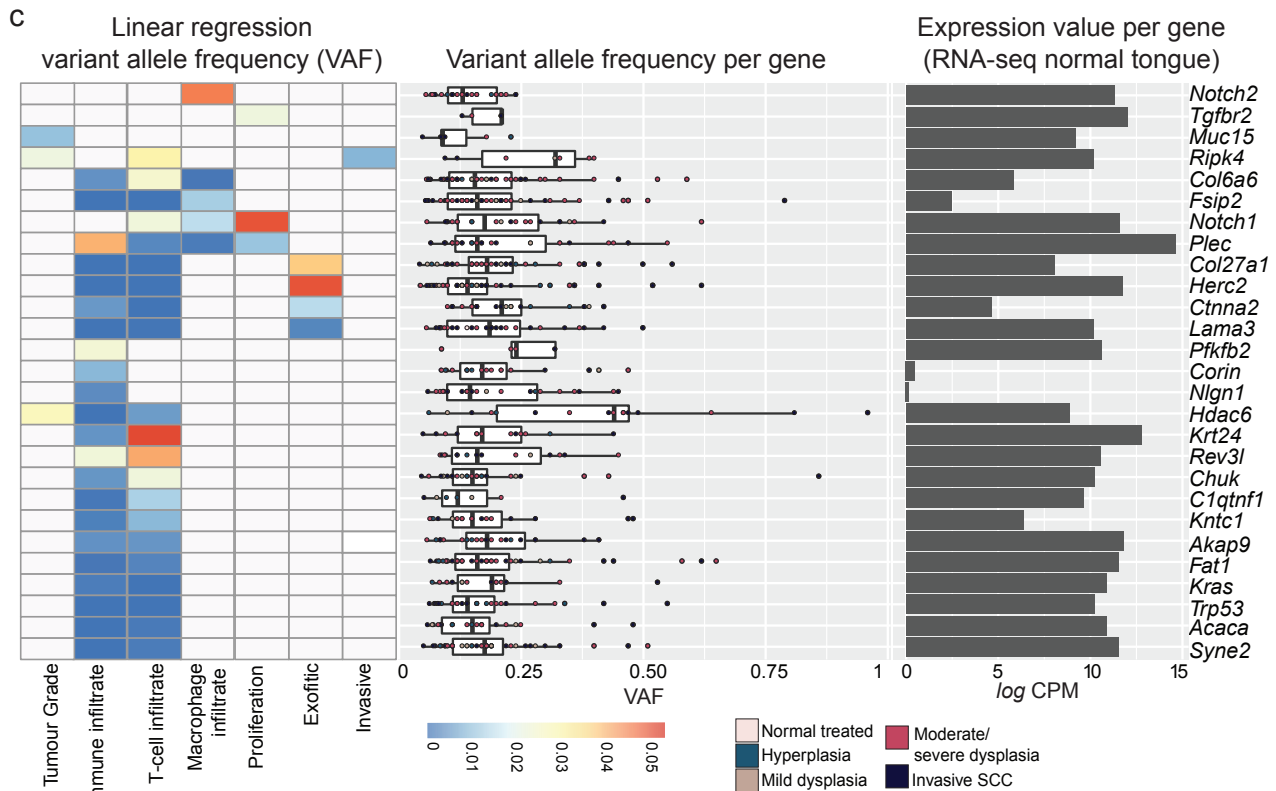

**d**

| Predictors       | Total mutations |          |                 |        |
|------------------|-----------------|----------|-----------------|--------|
|                  | Estimates       | CI       | p-value         |        |
| <b>All genes</b> | Exofitic        | 1302.997 | 08.92 – 1897.06 | <0.001 |
|                  | Proliferation   | 0.99     | -1.78 – -0.21   | 0.017  |
|                  | Tumour grade    | 404.25   | 220.75 – 587.76 | <0.001 |

**Supplementary Figure 4. Correlation between mutational landscape and tumour ecology.**

Related to Figure 5. **(a)** Immunofluorescence representative images of immune infiltrate labelling against CD45<sup>+</sup> total immune cells, CD3<sup>+</sup> T-cell infiltrate or CD68<sup>+</sup> macrophage infiltrate (red), anti-Krt14 (green) and counterstained with nuclear dye DAPI (blue). **(b)** Immunofluorescence representative images illustrating the quantification of immune infiltrate and proliferation. Each tumour was labelled with anti-Krt14 (green), anti-CD45 (red), anti-EdU (white) and counterstained with nuclear dye DAPI (blue). Dividing cells (EdU<sup>+</sup> cells) in the epithelium were quantified within the Krt14<sup>+</sup> region and density calculated by number of EdU<sup>+</sup> cells/mm<sup>2</sup> (white dotted regions). Immune infiltrate was quantified by the number of CD45<sup>+</sup> (or CD3<sup>+</sup> or CD68<sup>+</sup>) cells/mm<sup>2</sup> in tumour stromal region and epithelial basal layers (yellow lined regions). All tumours were analysed and for each tumour  $\geq 6$  regions (white dotted regions) were quantified per section (n=2-3 sections/tumour/staining). CD45<sup>+</sup> immune infiltrate index corresponds to <2,000 (index 1), 2,000-5,000 (index 2), 5,000-10,000 (index 3), >10,000 cells/mm<sup>2</sup> (index 4) (Supplementary Table 1). **(c)** Linear regression analysis to establish the relationship between the mutation VAF value (heatmap) of each gene (rows) and the clinical parameters (columns) (Supplementary Table 7). The boxplots on the middle depict the average VAF values for each gene (the middle line is the median, the lower and upper hinges are the first and third quartiles, the upper whisker extends from the hinge to the largest value no further than 1.5  $\times$  inter-quartile range from the hinge and the lower whisker extends from the hinge to the smallest value at most 1.5  $\times$  inter-quartile range of the hinge. Data beyond the end of the whiskers are outliers that are plotted individually). Each dot represents a mutation colour-coded according to the diagnosis of the sample where the mutation occurs. The histogram on the right represents the gene expression values from RNA-sequencing data. **(d)** Linear regression analysis of total number of mutations according to clinical parameters (tumour grade, tumour proliferation and exofitic tumour) for all genes. Predictors, Estimates, Confidence Interval (CI) and *p* values. Scale bars: 100 $\mu$ m (a), 200 $\mu$ m (b).



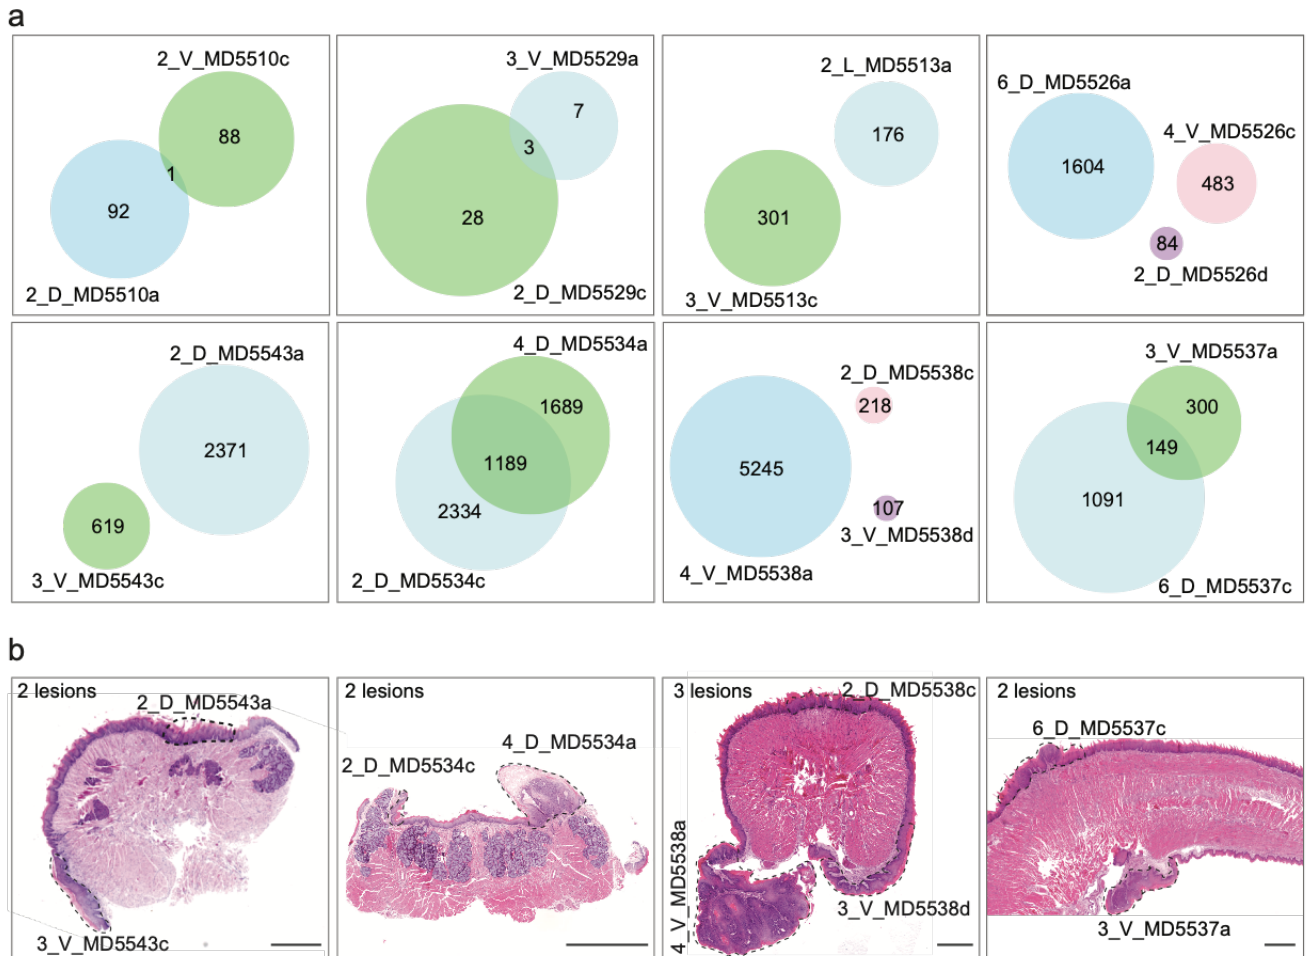

**Supplementary Figure 5. Comparative analysis of synchronous lesions in the same animal. (a)** VENN diagrams comparing the total numbers of mutations between two or three lesions from the same animals. **(b)** Representative sequential tumour sections sequential from the microdissected FFPE sections used for sequencing and stained with haematoxylin-eosin. Dotted lines represent the microdissected regions sequenced. n=6 animals with two synchronous lesions sequenced; n=2 animals with three synchronous lesions sequenced. Each number corresponds to the tumour reference: 2\_D\_MD5534c; 2, 3, 4 or 6=tumour grade, D=dorsal, V=ventral.

**Supplementary Table 1 – Clinical and biological data analysed in each tongue sample.**

| <b>Parameters analysed</b> | <b>Classification</b>                                         | <b>Method description</b>                                                                                                                                                                                                                                                                       |
|----------------------------|---------------------------------------------------------------|-------------------------------------------------------------------------------------------------------------------------------------------------------------------------------------------------------------------------------------------------------------------------------------------------|
| Weeks of treatment         | 4 – 26                                                        | Number of weeks after starting treatment administration (Figure 1a). Short (1-9 weeks), Medium (10-17 weeks) and Long treatment (18-26 weeks).                                                                                                                                                  |
| Lesions per animal         | 1 – 3                                                         | Number of lesions/tumors in each animal's tongue.                                                                                                                                                                                                                                               |
| Site                       | D, L, V                                                       | Dorsal, lateral, ventral (Figure 1b)                                                                                                                                                                                                                                                            |
| Lesion grading             | 1, 2, 3, 4, 5, 6                                              | Ascendant grading indicates increased abnormalities in the tissue. Numbers correspond to normal-treated tissue (1), hyperplasia (2), mild (3), moderate (4), or severe dysplasia (5) and invasive SCC (6) (Figure 1d).                                                                          |
| Lesion dimensions          | Length (µm), maximum diameter (µm), maximum invasiveness (µm) | Measurements were done using <i>NanoZoomer</i> Digital Pathology Software. Length corresponds to the tumour size along the basement membrane. Diameter was measured in 3 – 6 graded lesions and when applicable. Invasiveness length, when applicable, was measured from the basement membrane. |
| Tumour exophitic growth    | Y (Round, papilloma, verrucous), N                            | Assessments were made on observation of the H&E sections (Figure 1d). Y stands for Yes, N for No.                                                                                                                                                                                               |
| Tumour invasiveness        | Y, N                                                          | Assessments were made on observation of the H&E sections. Y stands for Yes, N for No.                                                                                                                                                                                                           |
| Lesion differentiation     | Well-differentiated, moderately differentiated                | Assessments were made on observation of Krt14 immunofluorescence staining (Supplementary Figure 5)                                                                                                                                                                                              |
| Immune infiltrate          | 1 - 4                                                         | Quantification of the CD45 <sup>+</sup> cells in tumour stroma. Index stands for <2 000 (1), 2 000 - 5 000 (2), 5 000 - 10 000 (3), >10 000 cells/mm <sup>2</sup> (4) (Figure 5 and Supplementary Figure 5).                                                                                    |
| T-cell infiltrate          | 1 - 3                                                         | Quantification of the CD3 <sup>+</sup> cells in tumour stroma. Index stands for <500 (1), 500 – 1 000 (2), >1 000 cells/mm <sup>2</sup> (3) (Figure 5 and Supplementary Figure 5).                                                                                                              |
| Macrophage infiltrate      | 1 - 3                                                         | Quantification of the CD68 <sup>+</sup> cells in tumour stroma. Index stands for 0 – 50 (1), 51 – 100 (2), >100 cells/mm <sup>2</sup> (3) (Figure 5 and Supplementary Figure 5).                                                                                                                |
| Proliferation              | 1 - 3                                                         | Quantification of EdU <sup>+</sup> cells in the Krt14 <sup>+</sup> microdissected tumour region (Figure 5 and Supplementary Figure 5). Index stands for <150 (1), 150 – 600 (2), >600 (3) cells/mm <sup>2</sup> .                                                                               |
